# Supplementary material
Source: MDPI journal article supplement (https://www.mdpi.com/2313-5786/1/4/20)
Supplement: s1 [file s1]

Archive with 1 entries (1 files):
- allergies-1324379-supplementary.pdf
